# Supplementary material for: Immunohistochemical Evaluation of Candidate Biomarkers for Fluorescence-Guided Surgery of Myxofibrosarcoma Using an Objective Scoring Method
Source: MDPI journal article supplement (doi:10.3390/biomedicines11030982), 2023-03-22
Supplement: s1 [file s1]

**Supplementary Table S1.** Antibodies used for immunohistochemical evaluation.

| Antigen         | Source            | Clone    | Manufacturer              | Cat. Nr. | Positive control       | Negative control | Dilution | Retrieval buffer | Retrieval method | Incubation temperature |
|-----------------|-------------------|----------|---------------------------|----------|------------------------|------------------|----------|------------------|------------------|------------------------|
| TEM-1           | Rabbit monoclonal | EPR17081 | Abcam                     | 204914   | Breast and endometrium | Spleen           | 1:2000   | pH high (EDTA)   | Overnight        | 4°C                    |
| VEGFR-1         | Rabbit monoclonal | Y103     | Abcam                     | 32152    | Placenta               | Liver            | 1:500    | pH low (citrate) | Overnight        | 4°C                    |
| VEGFR-2         | Rabbit monoclonal | 55B11    | Cell signaling technology | 2479     | Placenta and kidney    | Skin             | 1:300    | pH high (EDTA)   | Overnight        | 4°C                    |
| VEGF-A          | Mouse monoclonal  | G153-694 | BD Pharmingen             | 555036   | Placenta and tonsil    | Colon            | 1:400    | pH low (citrate) | 1 hour           | RT                     |
| EGFR            | Rabbit monoclonal | D38B1XP  | Cell signaling technology | 4267     | Placenta               | Tonsil           | 1:300    | pH low (citrate) | 1 hour           | RT                     |
| IGF-1R          | Rabbit monoclonal | D406W    | Cell signaling technology | 14534    | Placenta               | Skin             | 1:200    | pH low (citrate) | Overnight        | RT                     |
| PDGFR- $\alpha$ | Rabbit monoclonal | D13C6    | Cell signaling technology | 5241     | Placenta and Skin      | Spleen           | 1:100    | pH high (EDTA)   | Overnight        | 4°C                    |
| CD40            | Rabbit monoclonal | D8W3N    | Cell signaling technology | 40868    | Tonsil                 | Skin             | 1:100    | pH high (EDTA)   | Overnight        | 4°C                    |

Abbreviations: TEM-1 = Tumor endothelial marker-1; VEGFR-1 = Vascular endothelial growth factor receptor-1; VEGFR-2 = Vascular endothelial growth factor receptor-2; VEGF-A = Vascular endothelial growth factor-A; EGFR = Epidermal growth factor receptor; IGF-1R = Insulin-like growth factor-1 receptor; PDGFR- $\alpha$  = Platelet derived growth factor receptor  $\alpha$ ; CD 40 = Cluster of differentiation 40; and RT = Room Temperature.

**Supplementary Protocol S1.** Objective immunohistochemistry scoring method.

**Step 1. Select the regions of interest.**

Open the stained slide in ImageJ and select the regions of interest based on annotations from the pathologist. In ImageJ use “Analyze -> Tools -> ROI manager...” to select tumor tissue and adjacent healthy tissue (Figure S1).

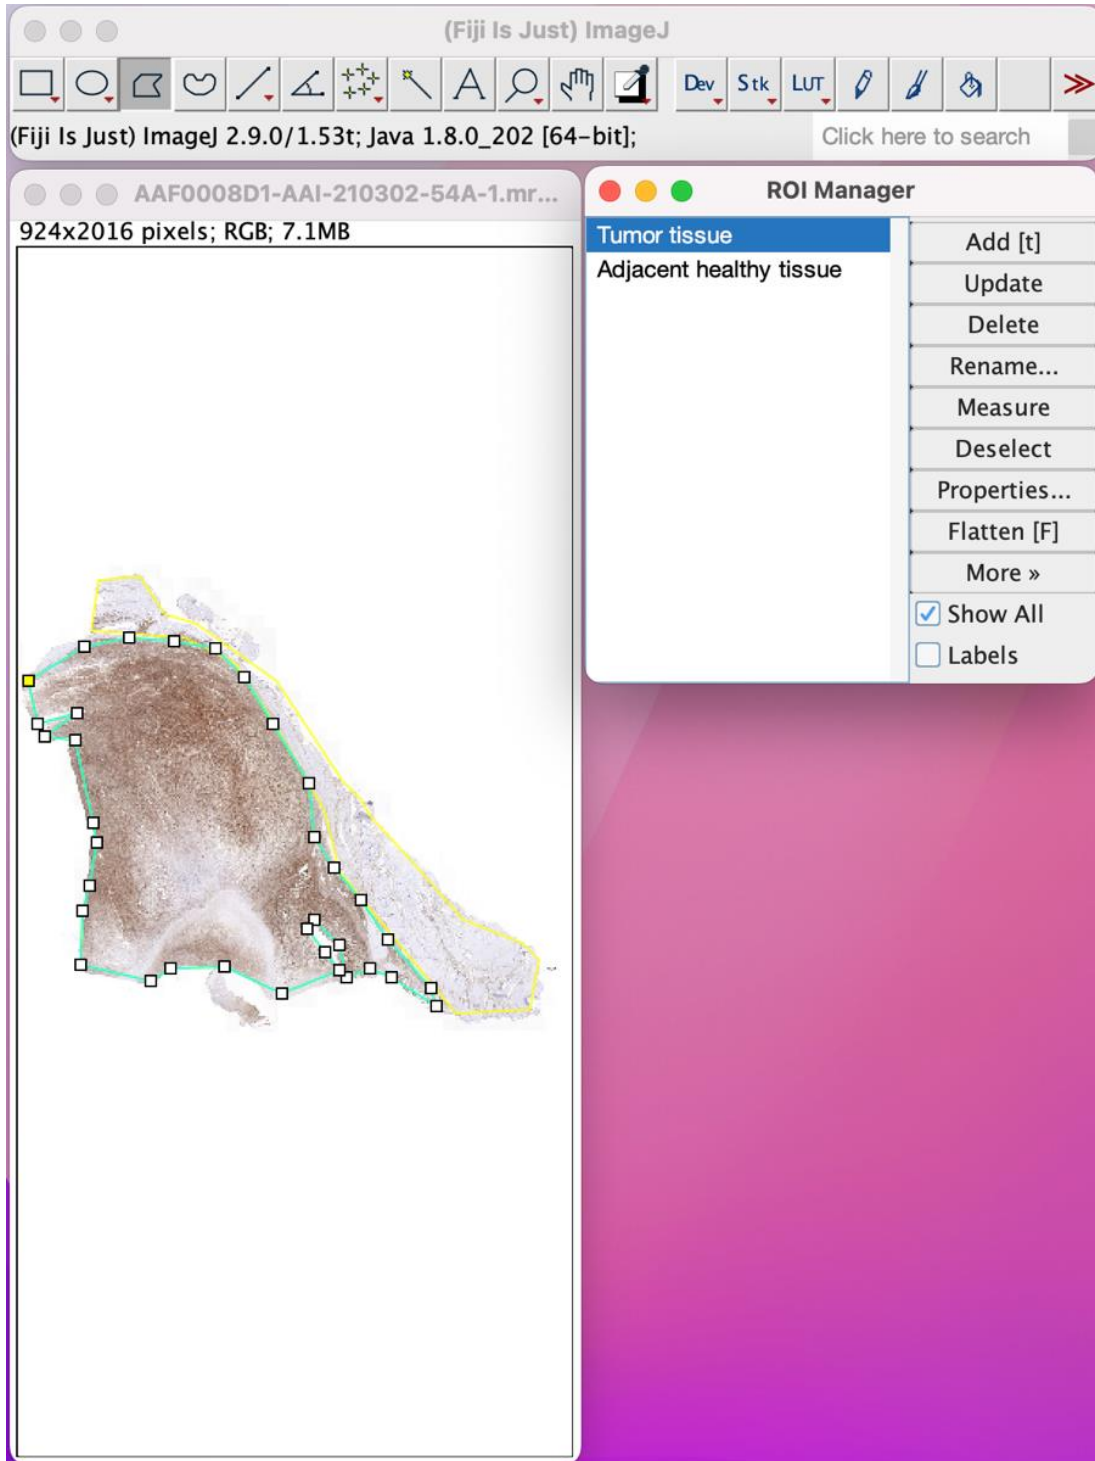

**Figure S1.** The regions of interest “Tumor tissue” and “Adjacent healthy tissue” have been selected.

**Step 2. Filter out background colors using the “color deconvolution” option in ImageJ.**

Select “Image -> Color -> Color deconvolution and select H&E DAB” in ImageJ to acquire the image that only shows the relevant brown DAB staining (Figure S2).

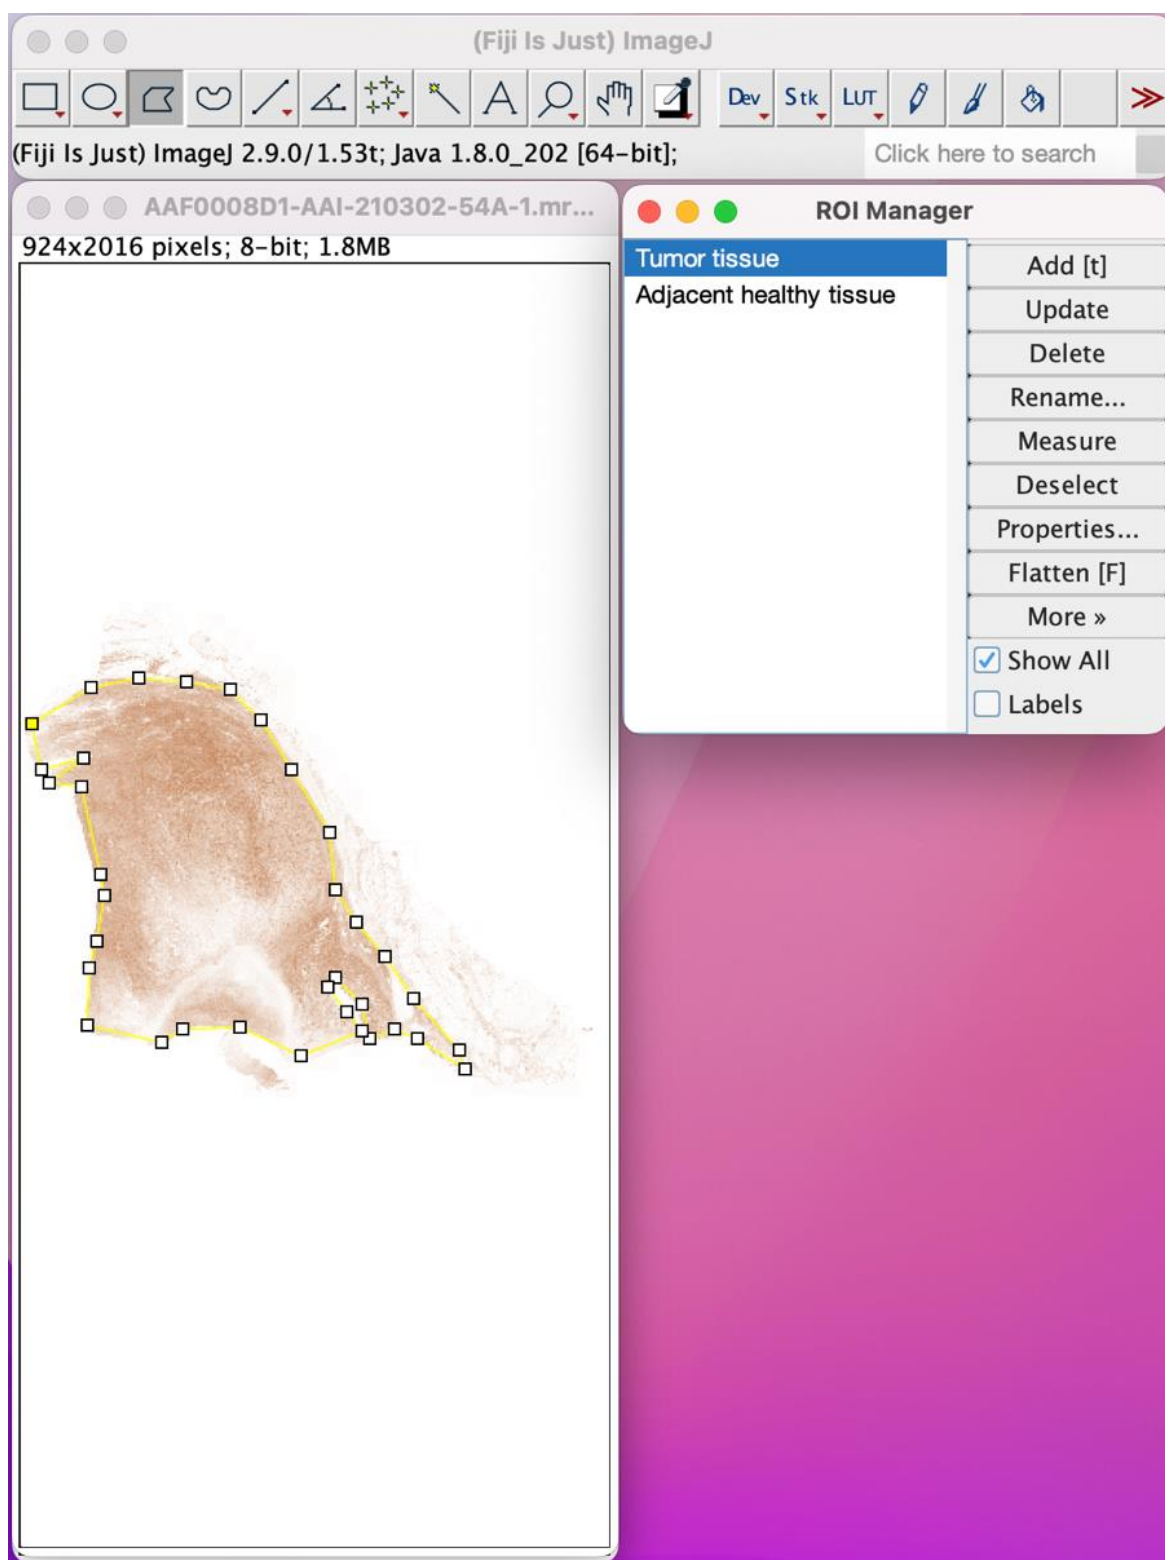

**Figure S2.** Only the relevant DAB staining is selected.

### Step 3. Change color to greyscale

Select “Edit -> Options -> Conversions...” and tick the “Weighted RGB conversions” box and click “OK”. Afterwards, select “Image -> Type -> 8-bit” to convert the brown DAB staining into grayscale.

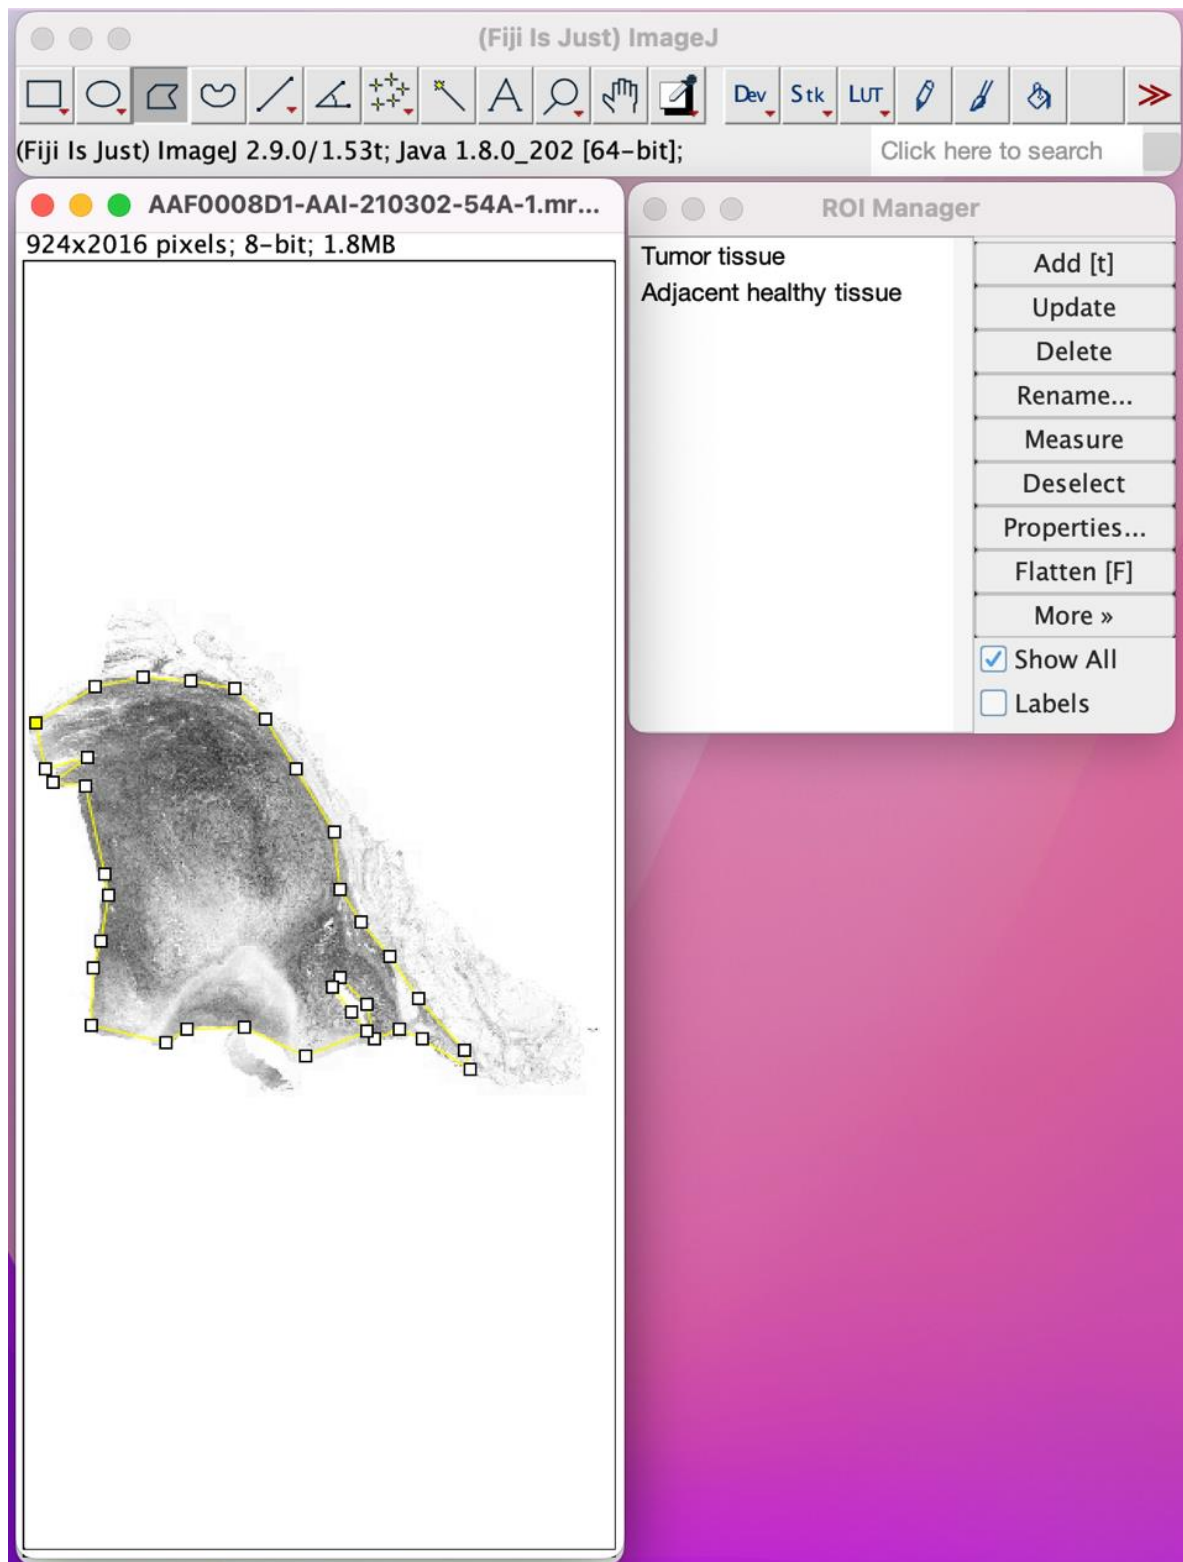

**Figure S3.** The image is converted into grayscale.

#### **Step 4. Invert black and white**

Select "Edit-> Invert" to invert the image. Now the pixel values correlate with staining intensity (Value black = 0 and value white = 255; Figure S4).

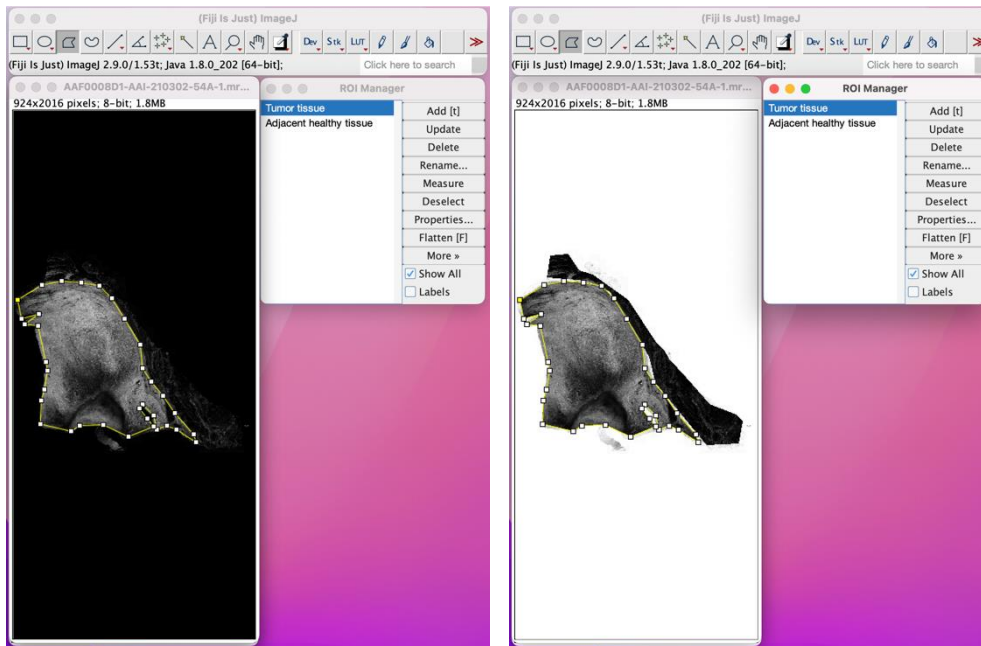

**Figure S4.** The whole image is inverted (left) or the selected regions are inverted (right); both options give the same result.

#### Step 5. Measure the mean pixel (staining) intensity value and the standard deviation

Select “Analyze -> Set Measurements...” and select “Mean gray value and Standard deviation”. In ROI manager select measure (Figure S5).

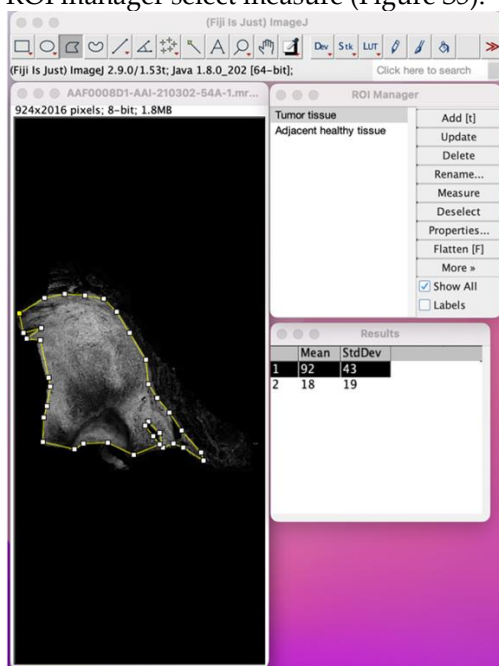

**Figure S5.** Mean intensity and standard deviation intensity values have been measured in “Tumor tissue (1)”, and “Adjacent healthy tissue (2)”.

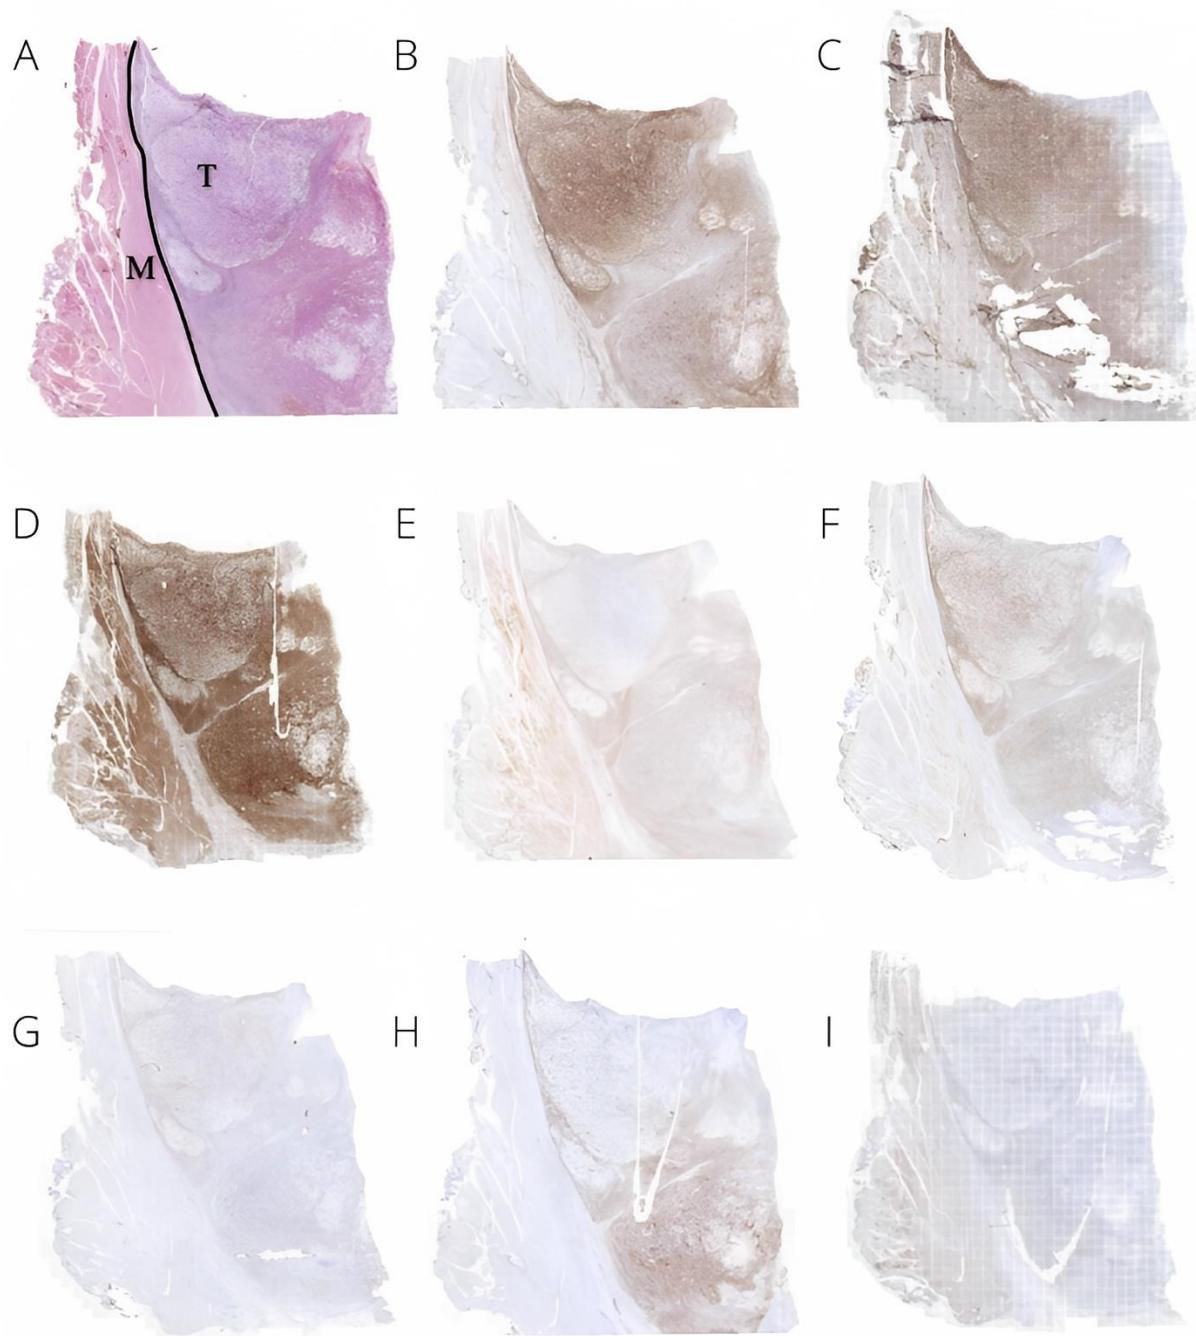

**Supplementary Figure S6.** MFS tumor located in the lower arm of a 64-year-old male who received preoperative radiotherapy. H&E staining of MFS tumor tissue (T), the tumor border (black line) and adjacent muscle tissue (M) (A). Corresponding TEM-1 staining displays TEM-1 expression in MFS tumor tissue, while TEM-1 expression in adjacent muscle tissue was low (B). PDGFR- $\alpha$  and VEGF-A staining was strong in MFS tumor tissue, but adjacent muscle tissue was also stained positive (C, D). Expression of VEGFR-2, VEGFR-1, EGFR, CD40 and GF-1R was less evident in MFS tumor tissue (E up until I).



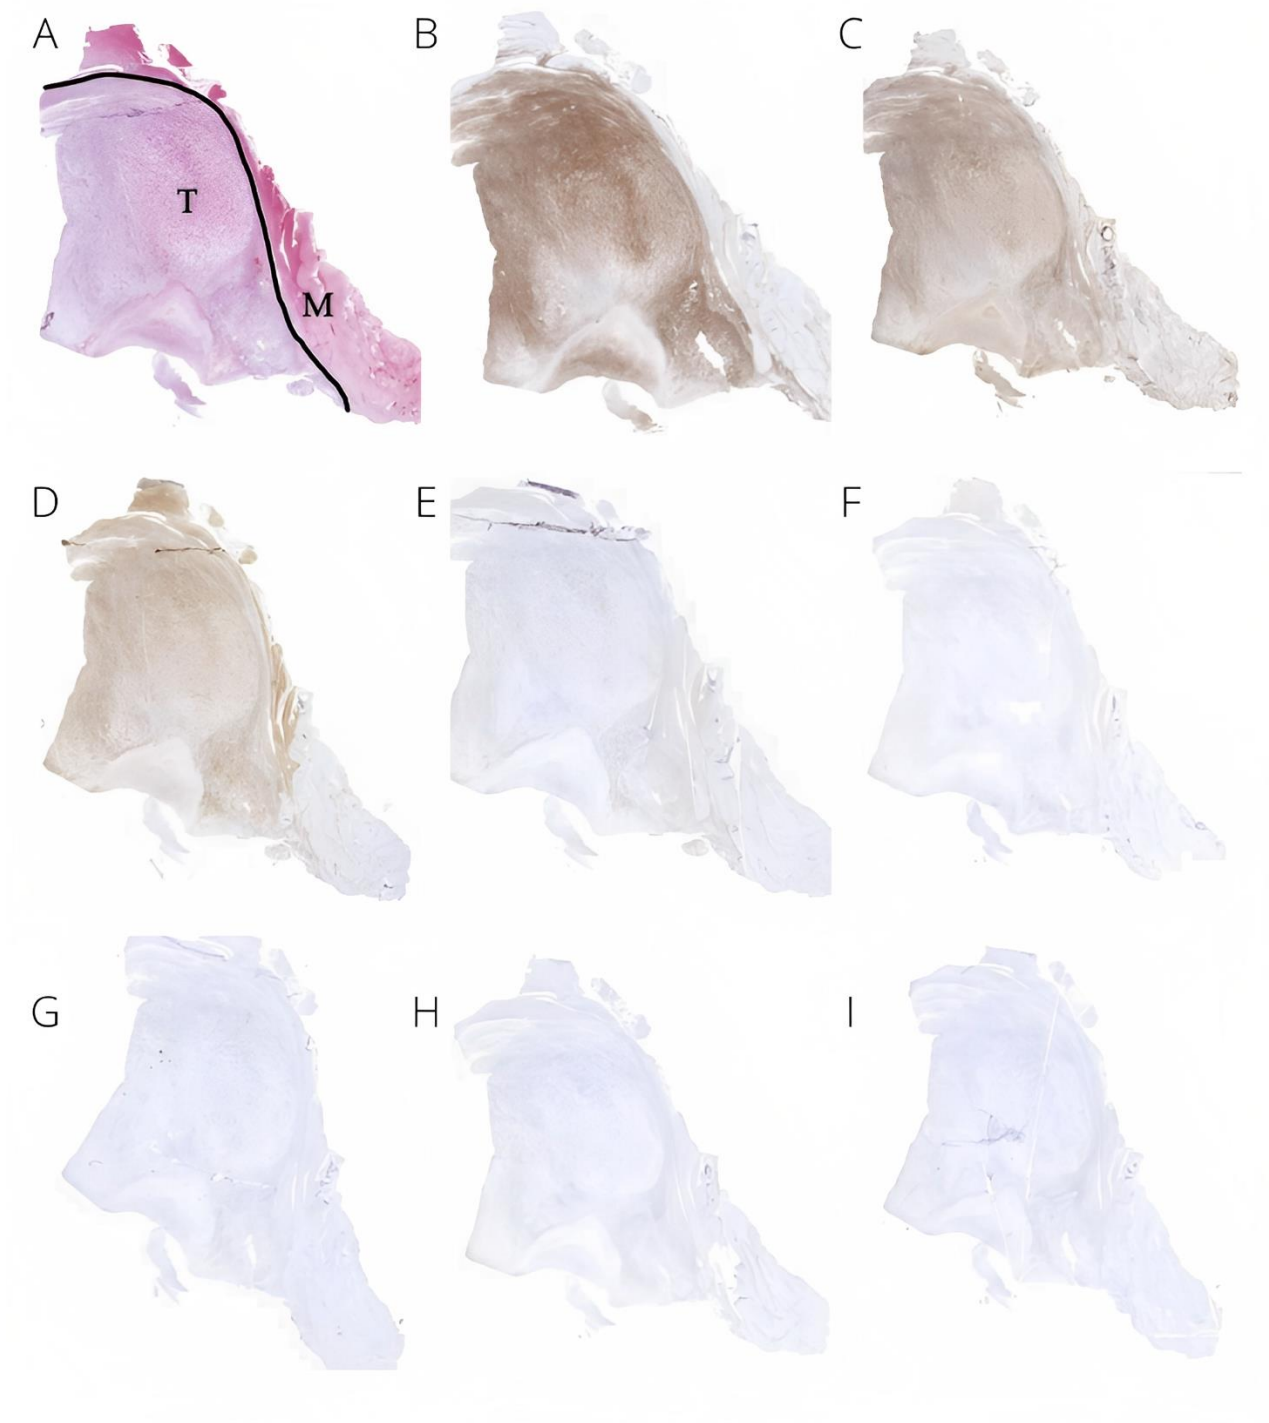

**Supplementary Figure S7.** Grade 2 MFS tumor located in the upper arm of a 63-year-old female. H&E staining of MFS tumor tissue (T), the tumor border (black line) and adjacent muscle tissue (M) (A). Corresponding TEM-1 staining shows strong TEM-1 expression in MFS tumor tissue, while TEM-1 expression in adjacent muscle tissue was low (B). PDGFR- $\alpha$  and VEGF-A staining was strong in MFS tumor tissue, but adjacent muscle tissue also stained positive (C, D). Although positive controls stained positive, there was virtually no expression of VEGFR-2, VEGFR-1, EGFR, CD40 and IGF-1R in MFS tumor tissue (E up until I).

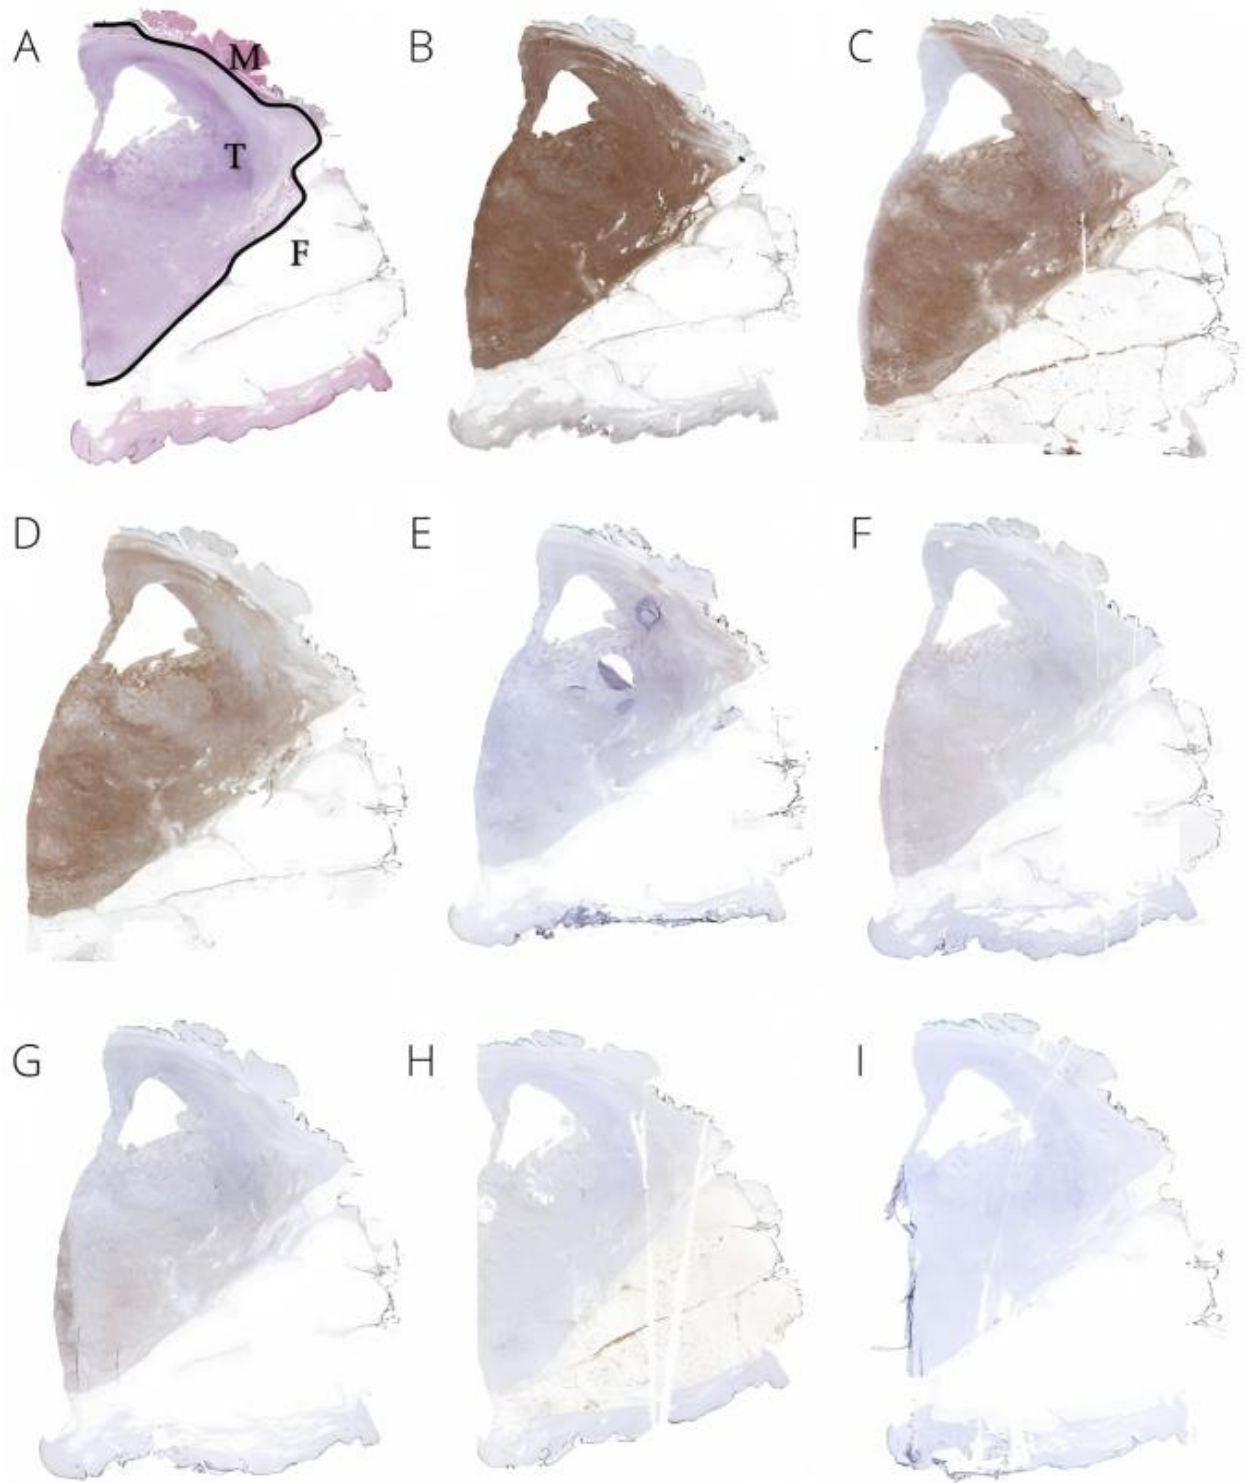

**Supplementary Figure S8.** Grade 3 MFS tumor located in the upper arm of a 64-year-old female. H&E staining of MFS tumor tissue (T), the tumor border (black line) and adjacent muscle- and fat tissue (M and F) (A). Corresponding TEM-1 staining displays TEM-1 expression in MFS tumor tissue, while TEM-1 expression in adjacent muscle- and fat tissue was low (B). PDGFR- $\alpha$  and VEGF-A staining was also strong in MFS tumor tissue, with little staining in adjacent muscle- and fat tissue (C, D). There was virtually no expression of VEGFR-2, VEGFR-1, EGFR, CD40 and IGF-1R (E up until I).
